# Supplementary material for: Amelioration of walnut-derived novel peptides against d-galactose-induced cognitive impairment by modulating the gut microbiota composition
Source: Royal Society of Chemistry journal article supplement (doi:10.1039/d2fo03775k), 2023-01-01
Supplement: d2fo03775k1.pdf [file d2fo03775k1.pdf]

**Amelioration of walnut-derived novel peptides against D-galactose-  
induced cognitive impairment by modulating gut microbiota  
composition**

Tingting Li<sup>a</sup>, Like Lin<sup>a</sup>, Cong Li<sup>a,\*</sup>, Jingyi Zheng<sup>a</sup>, Yehua Shen<sup>a,\*</sup>, Difeng Ren<sup>b</sup>

*<sup>a</sup>Key Laboratory of Synthetic and Natural Functional Molecule of Ministry of Education, College of Chemistry and Materials Science, National Demonstration Center for Experimental Chemistry Education, Northwest University, Xi'an, Shaanxi 710127, China*

*<sup>b</sup>Beijing Key Laboratory of Food Processing and Safety in Forestry, Department of Food Science and Engineering, College of Biological Sciences and Biotechnology, Beijing Forestry University, Beijing, 100083, China*

\*Corresponding author. Tel.: +86 13571961479, E-mail address: licong@nwu.edu.cn  
(C. Li);

\*Corresponding author. Tel.: +86 15191818556, E-mail address: yhshen@nwu.edu.cn  
(Y. Shen).

**Table S1** Peptides profile of WPH (<1kDa fraction) identified by HPLC-MS/MS

**Table S2** Forces and residues of the interaction of AChE with peptides

**Table S1** Peptides profile of WPH (<1kDa fraction) identified by HPLC-MS/MS

| No | Peptide       | RT         | Mass      | No  | Peptide       | RT         | Mass      |
|----|---------------|------------|-----------|-----|---------------|------------|-----------|
| 1  | AKLPLL        | 33.91      | 653.4476  | 165 | LTFLL         | 45.25      | 492.2948  |
| 2  | ALLGL         | 43         | 485.3213  | 166 | LTGF          | 16.03      | 436.2322  |
| 3  | ALPEDVL       | 42.64      | 755.4065  | 167 | LTPL          | 25.26      | 442.2791  |
| 4  | ALPEDVLLNH    | 40.57      | 1119.5923 | 168 | LTPW          | 25.58      | 515.2744  |
| 5  | ALPEEAF       | 34.06      | 775.3752  | 169 | LVAL          | 24.47      | 414.2842  |
| 6  | ALPEEAL       | 29.88      | 741.3908  | 170 | LVDGL         | 19.42      | 515.2955  |
| 7  | ALRL          | 10.22      | 471.3169  | 171 | LVLRR         | 9.25       | 752.5021  |
| 8  | APFPT         | 17.59      | 531.2693  | 172 | LVM(+15.99)W  | 25.99      | 563.2778  |
| 9  | APLL          | 20.81      | 412.2686  | 173 | LVMN          | 9.76       | 475.2465  |
| 10 | APLSVG        | 13.34      | 542.3064  | 174 | LVPLL         | 51.7/52.41 | 553.3839  |
| 11 | APPDLL        | 35.52      | 721.401   | 175 | LVVDGL        | 38.52      | 614.3639  |
| 12 | APPLL         | 29.51      | 509.3213  | 176 | LWDRPL        | 22.72      | 798.4388  |
| 13 | APQLL         | 25.17      | 540.3271  | 177 | LYAW          | 36.76      | 551.2744  |
| 14 | DADFLR        | 16.6       | 735.3551  | 178 | LYLQL         | 52.16      | 648.3846  |
| 15 | DELRVL        | 25.3/25.49 | 743.4177  | 179 | LYLR          | 10.1       | 563.3431  |
| 16 | DEQFR         | 6.29       | 693.3082  | 180 | N(+.98)ENARWL | 22.28      | 902.4246  |
| 17 | DFLFR         | 35.88      | 696.3595  | 181 | NFGVVK        | 10.22      | 662.3751  |
| 18 | DFWYQPR       | 34.17      | 1010.461  | 182 | NFPAL         | 37.43      | 560.2958  |
| 19 | DN(+.98)DLERL | 19.65      | 874.4032  | 183 | NFPLL         | 52.84      | 602.3428  |
| 20 | DNRVV         | 3.06/3.07  | 601.3184  | 184 | NKLPLL        | 29.92      | 696.4534  |
| 21 | DVLRL         | 25.03      | 614.3751  | 185 | NLDNELAMR     | 18.91      | 1074.5127 |
| 22 | EDGELR        | 6.12       | 717.3293  | 186 | NLPLL         | 46.32      | 568.3585  |
| 23 | EEAVLLAGAPL   | 26         | 1081.6018 | 187 | NLPLLQ        | 43.17      | 696.417   |
| 24 | EELL          | 20.35      | 502.2639  | 188 | NPGFW         | 35.23      | 619.2755  |

|    |               |                  |           |     |           |       |           |
|----|---------------|------------------|-----------|-----|-----------|-------|-----------|
| 25 | ELLR          | 9.08             | 529.3224  | 189 | NPGQF     | 10.13 | 561.2547  |
| 26 | EM(+15.99)VKL | 9.9              | 634.336   | 190 | NPPFF     | 43.57 | 620.2958  |
| 27 | ENLPLLR       | 28.97            | 853.5021  | 191 | NSAPR     | 7.61  | 543.2765  |
| 28 | ETFLR         | 10.91            | 664.3544  | 192 | NSFNLPLLR | 52.16 | 1072.6028 |
| 29 | EWVSR         | 9.33             | 675.334   | 193 | PEEVL     | 41.39 | 585.301   |
| 30 | EYWNRL        | 23.19            | 879.4239  | 194 | PGSR      | 9.28  | 415.2179  |
| 31 | FAAF          | 26.23            | 454.2216  | 195 | PLLK      | 22.25 | 469.3264  |
| 32 | FALR          | 10.1             | 505.3012  | 196 | QFPLL     | 52.81 | 616.3584  |
| 33 | FAPL          | 22.72            | 446.2529  | 197 | RLLPSF    | 49.08 | 731.433   |
| 34 | FDGF          | 21.79/24.74/26.6 | 484.1958  | 198 | RLWPF     | 52.02 | 717.3962  |
| 35 | FEKLPLL       | 51.85            | 858.5214  | 199 | RWLQ      | 10.32 | 601.3336  |
| 36 | FELR          | 10.42            | 563.3067  | 200 | RYLQ      | 0.14  | 578.3176  |
| 37 | FEMR          | 9.36             | 581.2631  | 201 | SDAL      | 0.01  | 404.1907  |
| 38 | FFAV          | 37.03            | 482.2529  | 202 | SDFVSR    | 9.16  | 709.3395  |
| 39 | FFGV          | 37.71            | 468.2372  | 203 | SGFDEEFLR | 37.16 | 1098.498  |
| 40 | FFPGLDY       | 52.72            | 857.3959  | 204 | SGGPL     | 6.11  | 429.2223  |
| 41 | FFPGLPNLK     | 51.93            | 1031.5803 | 205 | SGVLLR    | 9.84  | 643.4017  |
| 42 | FGESCC        | 8.23             | 644.1934  | 206 | SVLRL     | 15.27 | 586.3802  |
| 43 | FGGGF         | 20.4             | 483.2118  | 207 | SVVYR     | 7.82  | 622.3438  |
| 44 | FGPF          | 36.73            | 466.2216  | 208 | SWPGSR    | 9.28  | 688.3293  |
| 45 | FGVDL         | 41.66            | 549.2798  | 209 | SYLR      | 7.9   | 537.2911  |
| 46 | FGVF          | 38.14            | 468.2372  | 210 | TDDRFL    | 15.31 | 765.3657  |
| 47 | FGVV          | 20.58            | 420.2372  | 211 | TDDRFL    | 35.94 | 878.4498  |
| 48 | FGVVK         | 9.7              | 548.3322  | 212 | TDSF      | 8.47  | 468.1856  |
| 49 | FLAW          | 50.62            | 535.2795  | 213 | TELLR     | 9.76  | 630.3701  |
| 50 | FLDLLK        | 34.93/34.95      | 747.4531  | 214 | TGPL      | 9.79  | 386.2165  |

|    |            |             |          |     |                 |                   |           |
|----|------------|-------------|----------|-----|-----------------|-------------------|-----------|
| 51 | FLGAF      | 42.27       | 553.29   | 215 | TLPVL           | 39.54/43.87/50.74 | 541.3475  |
| 52 | FLGF       | 44.15       | 482.2529 | 216 | TLPVLM(+15.99)  | 35.62             | 688.3829  |
| 53 | FLGL       | 34.78       | 448.2686 | 217 | TLPVLN          | 31.79             | 655.3904  |
| 54 | FLLK       | 14.95       | 519.342  | 218 | TLPVLQ          | 34.33             | 669.4061  |
| 55 | FLLQ       | 32.52       | 519.3057 | 219 | TPFF            | 36.94             | 510.2478  |
| 56 | FLLR       | 15.88/21.47 | 547.3482 | 220 | TPLF            | 28.78             | 476.2635  |
| 57 | FLLRL      | 51.9        | 660.4323 | 221 | TRESF           | 6.38              | 638.3024  |
| 58 | FLPVL      | 53.19       | 587.3682 | 222 | TRWL            | 13.43             | 574.3227  |
| 59 | FLRFPL     | 52.69       | 791.4694 | 223 | TSGF            | 3.98              | 410.1801  |
| 60 | FLVR       | 10.16       | 533.3325 | 224 | TSQDL           | 1.18/6.28         | 562.2598  |
| 61 | FNLPLLK    | 52.05       | 843.5218 | 225 | TSVLR           | 3.05/3.06         | 574.3439  |
| 62 | FNLPLLR    | 52.28       | 871.528  | 226 | TVEDELRVL       | 34/45.52/45.53    | 1072.5764 |
| 63 | FPGCCSPETF | 24.68       | 1086.415 | 227 | TVEN(+.98)ELRVL | 45.53             | 1072.5764 |
| 64 | FPGSP      | 13.33       | 503.238  | 228 | TVLRPR          | 6.7               | 740.4657  |
| 65 | FPLY       | 35.79       | 538.2791 | 229 | TVQ(+.98)DVLPR  | 13.02             | 1083.6035 |
| 66 | FQLPR      | 16.04       | 659.3755 | 230 | TVRL            | 7.71              | 487.3118  |
| 67 | FRFF       | 49.76       | 615.3169 | 231 | TWLPLPR         | 50.68             | 881.5123  |
| 68 | FRLF       | 49.33       | 581.3325 | 232 | TYPGGF          | 21.89             | 640.2856  |
| 69 | FRWL       | 48.96       | 620.3434 | 233 | TYPGGFE         | 20.73             | 769.3282  |
| 70 | FSNAPR     | 7.61/8.6    | 690.3449 | 234 | TYPGLL          | 37.38             | 662.3639  |
| 71 | FSNAPRL    | 13.67/14.85 | 803.429  | 235 | TYPGNF          | 20.06             | 697.3071  |
| 72 | FSSF       | 16.5        | 486.2114 | 236 | TYPGVF          | 34.14             | 682.3326  |
| 73 | FVAPH      | 9.39/9.42   | 569.2961 | 237 | TYPGW           | 24.68             | 622.2751  |
| 74 | FVGF       | 34.2        | 468.2372 | 238 | VEDELR          | 9.05              | 759.3763  |
| 75 | FVLDLR     | 41.26       | 761.4435 | 239 | VEDELRF         | 25.75             | 906.4446  |
| 76 | FVLR       | 10.94       | 533.3325 | 240 | VEDELRVL        | 31.9              | 971.5287  |

|     |          |             |           |     |            |             |           |
|-----|----------|-------------|-----------|-----|------------|-------------|-----------|
| 77  | FVLR     | 50.44       | 646.4166  | 241 | VEDELVLR   | 21.18       | 971.5287  |
| 78  | FVPTF    | 42.11       | 609.3162  | 242 | VEGNL      | 9.6         | 530.27    |
| 79  | FVVR     | 9.45        | 519.3169  | 243 | VELH       | 0.72        | 496.2645  |
| 80  | FWDWDLPR | 52.81       | 1133.5293 | 244 | VFDGE      | 10.22       | 565.2383  |
| 81  | FYGF     | 38.1        | 532.2322  | 245 | VFDGL      | 30.97       | 549.2798  |
| 82  | FYGL     | 34.51       | 498.2478  | 246 | VFGPL      | 41.97       | 531.3057  |
| 83  | GGLRPF   | 15.56       | 645.3598  | 247 | VFSGF      | 30.97       | 555.2693  |
| 84  | GVGELH   | 8.82        | 610.3074  | 248 | VLDL       | 20.87       | 458.274   |
| 85  | GVLVK    | 7.33        | 514.3479  | 249 | VLLR       | 8.99        | 499.3482  |
| 86  | HVSL     | 7.66        | 454.254   | 250 | VLLRL      | 29.88       | 612.4323  |
| 87  | HWLYQ    | 15.34       | 745.3547  | 251 | VLPAL      | 35.52/33.77 | 511.337   |
| 88  | HWSY     | 10.07       | 591.2441  | 252 | VLPGEL     | 29.84       | 626.3639  |
| 89  | KGLLPL   | 30.95       | 639.4319  | 253 | VLPVF      | 51.26       | 573.3526  |
| 90  | KGVLLR   | 8.64        | 684.4646  | 254 | VLPVL      | 44.81       | 539.3683  |
| 91  | KLLPL    | 32.51       | 582.4105  | 255 | VLPVLN     | 35.73       | 653.4112  |
| 92  | KLLPLL   | 52.57       | 695.4945  | 256 | VLRLF      | 33.44       | 646.4166  |
| 93  | KLLPLY   | 37.83       | 745.4738  | 257 | VLRL       | 26.26       | 612.4323  |
| 94  | KLPF     | 17.85       | 503.3107  | 258 | VLRPR      | 1.22        | 639.418   |
| 95  | KLPLL    | 41.15       | 582.4105  | 259 | VPGLL      | 31.72       | 497.3213  |
| 96  | KLPLLF   | 53.01       | 729.4789  | 260 | VPHYN      | 8.08        | 628.2969  |
| 97  | KLPLLM   | 50.47       | 713.4509  | 261 | VSLPKPYLPR | 40.32       | 1168.6968 |
| 98  | KLPLLN   | 25.28       | 696.4534  | 262 | VSLR       | 3.88        | 473.2962  |
| 99  | KLPLLW   | 53.01       | 768.4897  | 263 | VSLY       | 17.78       | 480.2584  |
| 100 | KLPLLY   | 37.19/42.47 | 745.4738  | 264 | VSPL       | 11.42/12.64 | 414.2478  |
| 101 | KLWEE    | 11.53       | 703.3541  | 265 | VSPLL      | 28.97       | 527.3319  |
| 102 | KVTL     | 7.4         | 459.3057  | 266 | VVAF       | 20.35       | 434.2529  |

|     |          |             |          |     |                    |            |           |
|-----|----------|-------------|----------|-----|--------------------|------------|-----------|
| 103 | KVVDHL   | 8.95        | 709.4122 | 267 | VVDL               | 14.95      | 444.2584  |
| 104 | LADGLR   | 13.4        | 643.3653 | 268 | VVDRWL             | 24.74      | 786.4388  |
| 105 | LALGL    | 40.28       | 485.3213 | 269 | VVEGT              | 0.09/0.62  | 503.2591  |
| 106 | LALL     | 35.59/37.91 | 428.2999 | 270 | VVGENGQNVFDGELR    | 30.92      | 1631.7903 |
| 107 | LALR     | 9.08        | 471.3169 | 271 | VVGF               | 18.63      | 420.2372  |
| 108 | LAPL     | 16.07       | 412.2686 | 272 | VVGGF              | 16.1       | 477.2587  |
| 109 | LAPLL    | 37.22       | 525.3526 | 273 | VVLLLR             | 49.31      | 711.5007  |
| 110 | LAPW     | 25.52       | 485.2638 | 274 | VVLPLR             | 35.58      | 695.4694  |
| 111 | LDDELRVL | 33.99       | 971.5287 | 275 | VVPLLE             | 36.04      | 668.4108  |
| 112 | LERF     | 9.58        | 563.3067 | 276 | VVRF               | 9.96       | 519.3169  |
| 113 | LFSGF    | 37.34       | 569.2849 | 277 | VVRL               | 19.37/19.8 | 598.4166  |
| 114 | LGAL     | 19.35/21.22 | 372.2372 | 278 | VVRLW              | 29.56      | 671.4119  |
| 115 | LGDGL    | 20.35       | 473.2485 | 279 | VVVSPPF            | 47.13      | 743.4218  |
| 116 | LGDPS    | 6.1         | 487.2278 | 280 | VVVV               | 14.36      | 414.2842  |
| 117 | LGFE     | 17.41/18.16 | 464.2271 | 281 | VVVY               | 14.51      | 478.2791  |
| 118 | LGLL     | 35.91       | 414.2842 | 282 | VVVYL              | 40.36      | 591.3632  |
| 119 | LGLLK    | 15.28       | 542.3792 | 283 | WAGPL              | 32.5       | 542.2853  |
| 120 | LGLW     | 46.25       | 487.2794 | 284 | WAVL               | 37.93      | 487.2794  |
| 121 | LGPEL    | 24.82       | 527.2955 | 285 | WDNM(+15.99)       | 5.52       | 580.1951  |
| 122 | LLAE     | 10.75       | 444.2584 | 286 | WDPN               | 9.73       | 530.2125  |
| 123 | LLAF     | 41.48       | 462.2842 | 287 | WEESEN(+.98)EFQVVR | 35.79      | 1551.6841 |
| 124 | LLAL     | 37.31       | 428.2999 | 288 | WEESEN(+.98)EFRLQ  | 36.94      | 1466.6313 |
| 125 | LLGF     | 32.53       | 448.2686 | 289 | WGAV               | 14.62      | 431.2169  |
| 126 | LLGL     | 34.14       | 414.2842 | 290 | WGGL               | 32.9       | 431.2169  |
| 127 | LLGPAL   | 35.4        | 582.3741 | 291 | WLGL               | 50.94      | 487.2794  |
| 128 | LLGPF    | 49.96       | 545.3213 | 292 | WN(+.98)WDLPR      | 51.03      | 986.461   |

|     |               |                   |          |     |               |       |          |
|-----|---------------|-------------------|----------|-----|---------------|-------|----------|
| 129 | LLPAL         | 37.22             | 525.3526 | 293 | WNLL          | 51.99 | 544.3009 |
| 130 | LLPFRPL       | 52.92             | 854.5378 | 294 | WNLN          | 18.92 | 545.2598 |
| 131 | LLPH          | 8.96              | 478.2903 | 295 | WSAF          | 30.76 | 509.2274 |
| 132 | LLPL          | 36.53             | 454.3155 | 296 | WSML          | 42.21 | 535.2465 |
| 133 | LLPLF         | 53.45             | 601.3839 | 297 | WSMV          | 29.63 | 521.2308 |
| 134 | LLPLLK        | 33.26             | 695.4945 | 298 | WSPN          | 9.76  | 502.2176 |
| 135 | LLPQ          | 17.54/17.74/45.38 | 469.29   | 299 | WTLL          | 52.34 | 531.3057 |
| 136 | LLPSF         | 42.74             | 575.3318 | 300 | WVAL          | 36.67 | 487.2794 |
| 137 | LLPSL         | 33.3              | 541.3475 | 301 | WVAR          | 7.61  | 530.2965 |
| 138 | LLPSY         | 22.31             | 591.3268 | 302 | WVGPF         | 50.07 | 604.3009 |
| 139 | LLPVTP        | 32.32             | 638.4003 | 303 | WVGPLL        | 53.24 | 683.4006 |
| 140 | LLPW          | 44.71             | 527.3108 | 304 | WVLRPR        | 10.84 | 825.4973 |
| 141 | LLRFPL        | 52.05             | 757.485  | 305 | WVSL          | 34.17 | 503.2744 |
| 142 | LLRL          | 15.24             | 513.3638 | 306 | WVSW          | 39.39 | 576.2697 |
| 143 | LLVM          | 15.04/30          | 474.2876 | 307 | YALR          | 8.82  | 521.2961 |
| 144 | LLVM(+15.99)W | 52.05             | 676.3618 | 308 | YHLQ          | 8.59  | 559.2755 |
| 145 | LLWPF         | 53.5              | 674.3792 | 309 | YKLPLL        | 51.64 | 745.4738 |
| 146 | LNLPLLR       | 51.21             | 837.5436 | 310 | YLDGR         | 8.62  | 622.3074 |
| 147 | LNRFPL        | 48.88             | 758.4439 | 311 | YLDM(+15.99)S | 9.79  | 643.2523 |
| 148 | LPDFL         | 52.19             | 603.3268 | 312 | YLGf          | 36.48 | 498.2478 |
| 149 | LPDVL         | 32.59             | 555.3268 | 313 | YLPLEGL       | 52.95 | 803.4429 |
| 150 | LPEYL         | 33.8              | 633.3373 | 314 | YLVK          | 8.67  | 521.3213 |
| 151 | LPFNLQ        | 45.49             | 730.4014 | 315 | YLVKL         | 23.03 | 634.4054 |
| 152 | LPGEF         | 21.62             | 561.2798 | 316 | YLVM(+15.99)  | 12.92 | 540.2618 |
| 153 | LPLL          | 43.22/44.8/48.22  | 454.3155 | 317 | YNLN          | 9.82  | 522.2438 |
| 154 | LPLLR         | 19.59/24.25       | 610.4166 | 318 | YSVGPF        | 37.63 | 668.317  |

|     |        |                 |          |     |       |       |          |
|-----|--------|-----------------|----------|-----|-------|-------|----------|
| 155 | LPSF   | 29.98/45.19     | 462.2478 | 319 | YVAPH | 8.12  | 585.2911 |
| 156 | LPVL   | 33.5/34.8       | 440.2999 | 320 | YVDTR | 6.07  | 652.3181 |
| 157 | LRFP   | 41.58/43.6/49.2 | 644.4009 | 321 | YVESR | 6.07  | 652.318  |
| 158 | LRL    | 20.94           | 513.3638 | 322 | YVLRL | 30.13 | 662.4115 |
| 159 | LRLW   | 32.56           | 586.3591 | 323 | YVPH  | 0.09  | 514.254  |
| 160 | LSAPR  | 7.55            | 542.3176 | 324 | YVPHL | 15.34 | 627.338  |
| 161 | LSLL   | 37.49           | 444.2948 | 325 | YVTL  | 34.06 | 494.274  |
| 162 | LSPL   | 15.68/18.09     | 428.2635 | 326 | YVTLK | 9.33  | 622.369  |
| 163 | LSPLL  | 33.3            | 541.3475 | 327 | YVVR  | 6.21  | 535.3118 |
| 164 | LSPLNF | 48.03           | 689.3748 | 328 | YYLR  | 9.65  | 613.3224 |

**Table S2** Forces and residues of the interaction of AChE with peptides

| Parameter                  | AChE-RLWPF                                                                                                  | AChE-VLRLF                                                                                                                                               |
|----------------------------|-------------------------------------------------------------------------------------------------------------|----------------------------------------------------------------------------------------------------------------------------------------------------------|
| Conventional hydrogen bond | Trp84, Ser122, Phe331, Gln74, Tyr70, Tyr121, Tyr334                                                         | Trp84, Arg289, Tyr70, His440                                                                                                                             |
| Carbon hydrogen bond       |                                                                                                             | Leu282, Trp279, Trp432, Tyr70, Trp84, Phe330, Phe331                                                                                                     |
| $\pi$ -alkyl               | Phe330, Phe331, Trp279                                                                                      |                                                                                                                                                          |
| $\pi$ - $\pi$ bond         | Trp84                                                                                                       |                                                                                                                                                          |
| Van der Waals              | Gly335, Glu73, Val71, Ser286, Ile287, Arg289, Phe290, Asn85, Gly123, Glu199, His440, Gly118, Gly117, Tyr130 | Phe288, Ser286, Ile287, Gly335, Pro86, Gln69, Asn85, Gly80, Gly123, Phe290, Ser122, Tyr121, Phe331, Ser81, Gly119, Gly118, Ser200, Tyr130, Glu199, Val71 |
| $\pi$ -cation              | Phe288                                                                                                      | Asp72, Tyr334                                                                                                                                            |
| $\pi$ -donor hydrogen bond | □                                                                                                           | Phe330                                                                                                                                                   |
